# Supplementary material for: Flow Cytometric Sorting of Infected Erythrocytes Demonstrates Reliable Detection of Individual Ring-Stage Plasmodium falciparum Parasites by Plasmodium 18S rRNA Reverse Transcription Polymerase Chain Reaction
Source: PubMed Central journal article supplement (PMC9209910; doi:10.4269/ajtmh.21-1226), 2022-04-11

**Supplemental Figure S1. Microscopic blood smear of *P. falciparum* cultures.** Examples of iRBCs containing (A) a single ring, (B) multiple rings, (C) early trophozoites, and (D) late trophozoites.

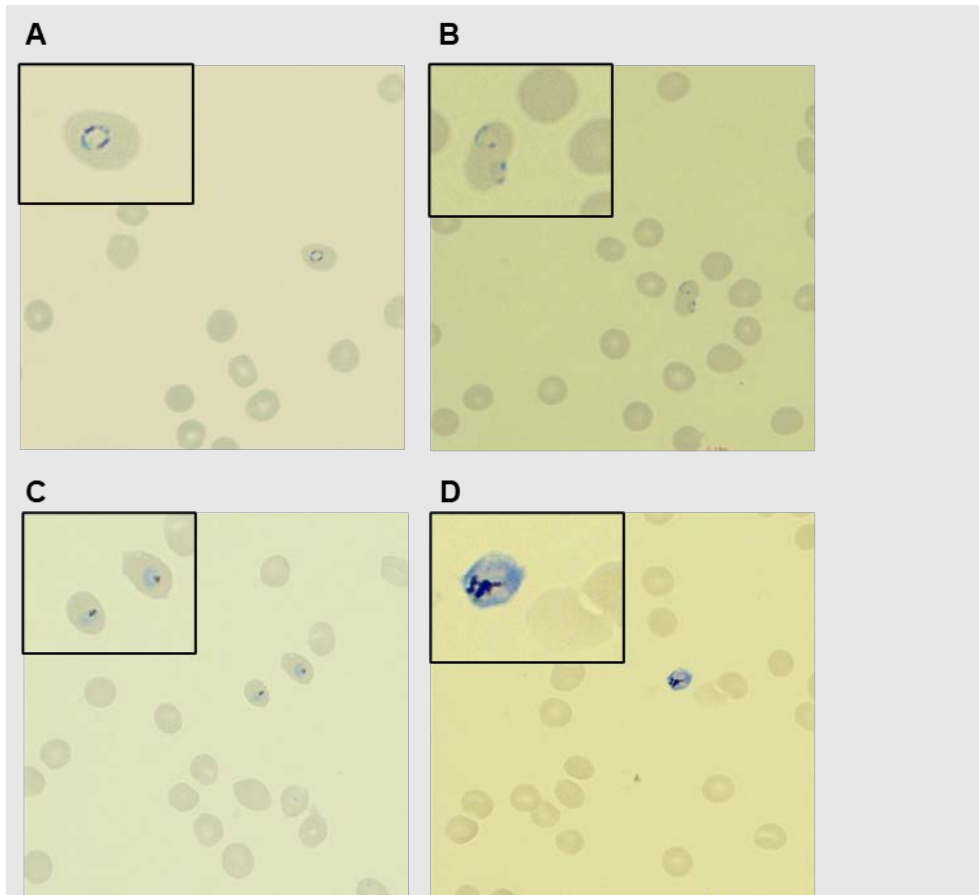

**Supplemental Figure S2. Flow sort single-ring iRBC of *P. falciparum* culture.** Distribution of uninfected RBCs and iRBCs in synchronous (A) and asynchronous (B) *P. falciparum* cultures stained by Hoechst 33342 and thiazole orange, which emitted fluorescence filtered by DAPI and FITC, respectively. Infected RBCs and single-ring iRBCs were gated and marked with “++” and Rings, respectively.

**A.**

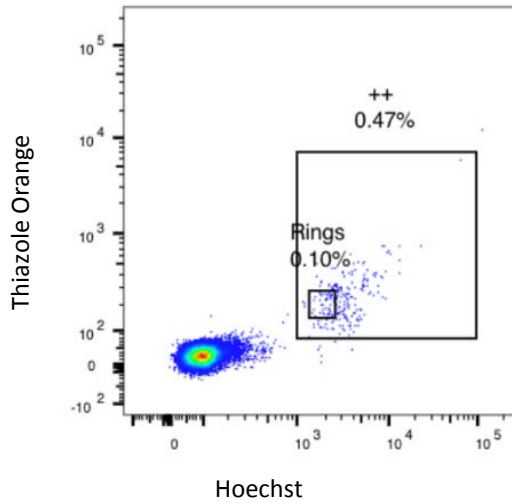

**B.**

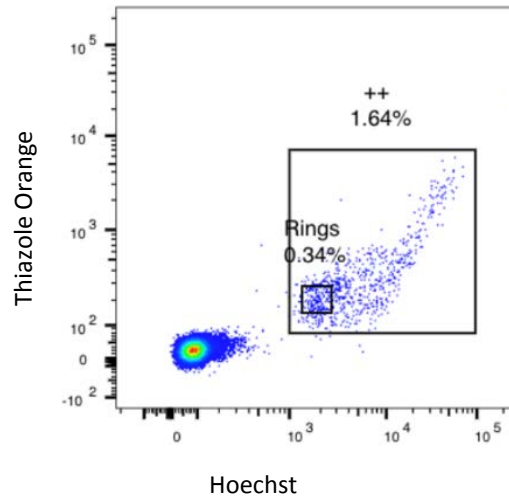

**Supplemental Figure S3. Subpatent parasitemia measured by the Gen3.0 (A) and Gen3.5 (B) assays.**

Synchronous *P. falciparum* cultures were used to prepare High Pos, Mid Pos and Low Pos controls of different densities. Nominal densities of them were  $4 \times 10^5$ ,  $2 \times 10^3$ ,  $1.0 \times 10^2$  parasites/mL blood, respectively, used for evaluation of the Gen3.0 assay and they were  $9 \times 10^5$ ,  $4 \times 10^3$ ,  $2 \times 10^2$  parasites/mL blood, respectively, for the Gen3.5 assay. Multiple replicates were run by *P. falciparum* qRT-PCR (Pf) and pan *Plasmodium* qRT-PCR (Pan) of each assay.

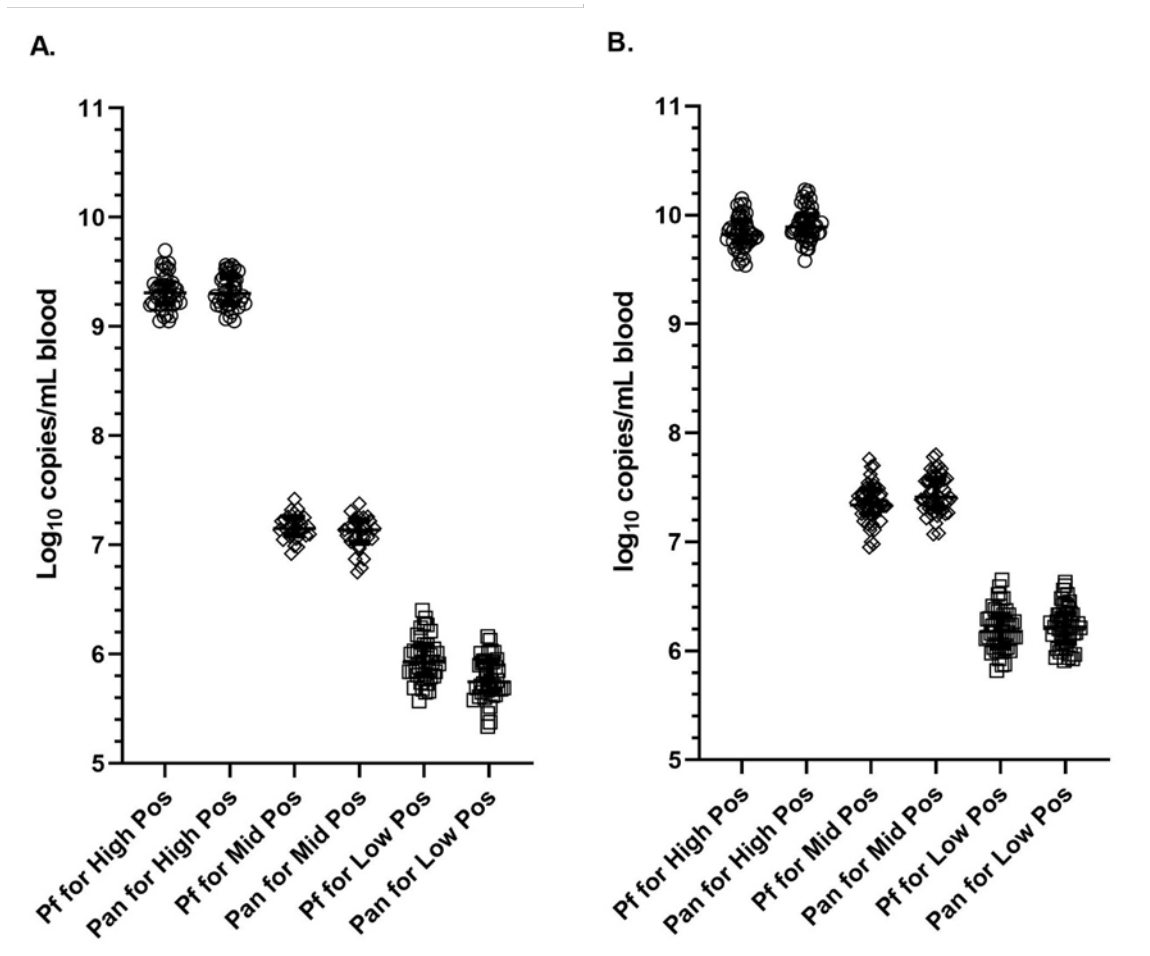

Supplement: tpmd211226.SD1.pdf [file tpmd211226.SD1.pdf]
